# Supplementary material for: Evolutionary Expansion of WRKY Gene Family in Banana and Its Expression Profile during the Infection of Root Lesion Nematode, Pratylenchus coffeae
Source: PLoS One. 2016 Sep 7;11(9):e0162013. doi: 10.1371/journal.pone.0162013 (PMC5014340; doi:10.1371/journal.pone.0162013)
Supplement: S4 Table — (XLSX) [file pone.0162013.s006.xlsx]

## Sheet: Sheet1
Supplementary Table 4. List of MusaWRKYs having LXXL, Leucine zipper, HARF and LXLXL motifs
Groups	MusaWRKY name	Musagenome ID	Domain types	Domain Sequence
Group I	MusaWRKY18	GSMUA_Achr3T09940_001	LXXL	SLSLAELLES
Group I	MusaWRKY5	GSMUA_Achr1T17160_001	LXXL	FRPLPELLAR
Group I	MusaWRKY2	GSMUA_Achr1T05010_001	LXXL	PYGLHELCKP
Group I	MusaWRKY80	GSMUA_Achr7T00610_001	LXXL	VASLRHLPTP
Group II-a	MusaWRKY81	GSMUA_Achr7T05200_001	LXLXLX	PSLNLDLNVG
Group II-a	MusaWRKY127	GSMUA_Achr10T06050_001	LXLXLX	PSLDLGLHVG
Group II-b	MusaWRKY10	GSMUA_Achr2T15200_001	LEUCINE ZIPPER	LNETLNQLTASYNALQMHLIAL
Group II-b	MusaWRKY68	GSMUA_Achr6T07620_001	LEUCINE ZIPPER	LRLMLNQLTTNYNALQMQLVAL
Group II-b	MusaWRKY145	GSMUA_Achr11T17620_001	LEUCINE ZIPPER	RVRDENRRLRSMMDQLTQSYTAL
Group II-b	MusaWRKY68	GSMUA_Achr6T07620_001	LXLXLX	NKLRLMLNQL
Group II-b	MusaWRKY62	GSMUA_Achr6T02330_001	LXLXLX	TELSLSLSLQ
Group II-b	MusaWRKY92	GSMUA_Achr7T18820_001	LXLXLX	KELGLSLTLQ
Group II-b	MusaWRKY140	GSMUA_Achr10T30080_001	LXLXLX	NELGLSLSLR
Group II-d	MusaWRKY129	GSMUA_Achr10T08720_001	LXXL	FRRLVSLLGN
Group II-d	MusaWRKY135	GSMUA_Achr10T23420_001	HARF	RTGHARFRRS
Group II-d	MusaWRKY122	GSMUA_Achr9T22950_001	HARF	RTGHARFRRG
Group II-d	MusaWRKY90	GSMUA_Achr7T15930_001	HARF	RTGHARFRRS
Group II-d	MusaWRKY60	GSMUA_Achr5T21910_001	HARF	GTGHARFRRG
Group II-d	MusaWRKY46	GSMUA_Achr4T20600_001	HARF	RTGHARFRRG
Group II-d	MusaWRKY25	GSMUA_Achr3T27880_001	HARF	RTGHARFRRG
Group II-d	MusaWRKY17	GSMUA_Achr3T05670_001	HARF	RTGHARFRRG
Group II-d	MusaWRKY15	GSMUA_Achr3T00510_001	HARF	RTGHARFRRG
Group II-d	MusaWRKY6	GSMUA_Achr1T23560_001	HARF	RTGHARFRRG
Group II-d	MusaWRKY6	GSMUA_Achr1T23560_001	LXLXLX	EHLALQLSTH
Group II-d	MusaWRKY51	GSMUA_Achr5T04870_001	LXLXLX	APLALTLPPA
Group II-e	MusaWRKY75	GSMUA_Achr6T31840_001	LXXL	PYELEELCQP
Group III	MusaWRKY7	GSMUA_Achr1T27980_001	LXXL	DFMLEELDFE
Group III	MusaWRKY24	GSMUA_Achr3T25080_001	LXXL	GLLLAELARV
Group III	MusaWRKY87	GSMUA_Achr7T14140_001	LXXL	SSLLRLLAQG
Group III	MusaWRKY43	GSMUA_Achr4T15640_001	LXLXLX	QHLALQLVAH
