# Supplementary material for: Evolutionary Expansion of WRKY Gene Family in Banana and Its Expression Profile during the Infection of Root Lesion Nematode, Pratylenchus coffeae
Source: PLoS One. 2016 Sep 7;11(9):e0162013. doi: 10.1371/journal.pone.0162013 (PMC5014340; doi:10.1371/journal.pone.0162013)
Supplement: S8 Table — (XLSX) [file pone.0162013.s010.xlsx]

## Sheet: Sheet1
Supplementary file 8. Expression of WRKY gene family in various plant species against nematodes
WRKY name	Accession no	Plant species	WRKY regulation	Nematode name	Phenotype towards pathogens	References
WRKY23	NM_130234	Arabidopsis thaliana	Up	Heterodera schachtii	AtWRKY23 involved in feeding site formation in roots	[32]
WRKY6	NA	Arabidopsis ecotype	Down	Heterodera schachtii	Repress the defense responses in plant	[42]
WRKY11	NA	Arabidopsis ecotype	Up	Heterodera schachtii	WRKY11 mutant shows highly susceptible to nematode	[42]
WRKY17	At2g24570	Arabidopsis ecotype	Up	Heterodera schachtii	WRKY17 mutant shows highly susceptible to nematode	[42]
WRKY33	At2g38470	Arabidopsis ecotype	Up	Heterodera schachtii	Resistant to nematode	[42]
WRKY23	At2G47260	Arabidopsis ecotype	Up	Heterodera schachtii	Important for development of H. schachtii	[42]
WRKY48	At5G49520	Arabidopsis ecotype	Up	Heterodera schachtii	Repressor of basal defense in Arabidopsis and thus its up-regulation would be in favour of nematode development	[42]
WRKY1a	DQ335599	Coffea arabica	Up	Meloidogyne exigua	Resistance to root knot nematode	[36]
WRKY1b	DQ335598	Coffea arabica	Up	Meloidogyne exigua	Resistance to root knot nematode	[36]
WRKY13	Os01t0750100	Oryza sativa	Down	Meloidogyne graminicola	Positive transcriptional regulators of defense genes	[55]
WRKY62	LOC_Os09g25070	Oryza sativa	Up	Hirschmanniella oryzae	strongly up-regulated at 3 dai after migratory nematode infection	[14]
WRKY70	LOC_Os05g39720	Oryza sativa	Up	Hirschmanniella oryzae	strongly up-regulated at 3 dai after migratory nematode infection	[14]
WRKY11	LOC_Os01g43650_ext	Oryza sativa	Up	Hirschmanniella oryzae	strongly up-regulated at 3 dai after migratory nematode infection	[14]
WRKY45	LOC_Os05g25770	Oryza sativa	Up	Hirschmanniella oryzae	NA	[14]
WRKY51	LOC_Os04g21950	Oryza sativa	Up	Hirschmanniella oryzae	NA	[14]
WRKY59	LOC_Os01g51690	Oryza sativa	Up	Hirschmanniella oryzae	NA	[14]
WRKY66	LOC_Os02g47060_ext	Oryza sativa	Up	Hirschmanniella oryzae	NA	[14]
WRKY77	LOC_Os01g40260	Oryza sativa	Up	Hirschmanniella oryzae	NA	[14]
WRKY34	LOC_Os02g43560	Oryza sativa	Up	Meloidogyne graminicola	specifically induced in gall tissue	[14]
WRKY36	LOC_Os04g46060	Oryza sativa	Up	Meloidogyne graminicola	specifically induced in gall tissue	[14]
WRKY72a	GU017421	Solanum lycopersicum	Up	Meloidogyne spp.	Resistance against RKN	[44]
WRKY72b	GU017422	Solanum lycopersicum	Up	Meloidogyne spp.	Resistance against RKN	[44]
WRKY70	XM_004235183.2	solanum lycopersicum	Up	Meloidogyne javanica	Resistance against RKN	[56]
WRKY21	Glyma02g15920.1	Glycine max	Up	Meloidogyne incognita	NA	[33]
WRKY6	NM_001250384.1	Glycine max	Down	Meloidogyne incognita	NA	[33]
WRKY15	EU019560.1	Glycine max	Down	Meloidogyne incognita	NA	[33]
WRKY22	KM438457.1	Glycine max	Down	Meloidogyne incognita	NA	[33]
